# Supplementary material for: Estimating age-stratified influenza-associated invasive pneumococcal disease in England: A time-series model based on population surveillance data
Source: PubMed Central journal article supplement (PMC6597037; doi:10.1371/journal.pmed.1002829), 2019-06-27
Supplement: pmed.1002829.s014.pdf [file pmed.1002829.s014.pdf]

|   | covar          | shared pars                                                                                                     | AIC      |
|---|----------------|-----------------------------------------------------------------------------------------------------------------|----------|
| G | Flu            | all age-spec                                                                                                    | 13218.85 |
| H | Flu            | $\delta_a = \delta$                                                                                             | 13216.32 |
| I | Flu            | $\delta_a = \delta, \tau_{<5} = \tau_{65+} = 0$                                                                 | 13212.32 |
| J | Flu+rhinov     | $\delta_a = \delta, \tau_{<5} = \tau_{65+} = \theta_{5-14} = \theta_{15-44} = 0$                                | 13160.70 |
| K | Flu+rhinov+RSV | $\delta_a = \delta, \tau_{<5} = \tau_{65+} = \theta_{5-14} = \theta_{15-44} = \zeta_{5-14} = \zeta_{15-44} = 0$ | 13143.67 |

**S1 Table .** Multivariate model comparison in terms of AIC and one-step ahead forecast ( $\log(s(P,x))$ )
