# Supplementary material for: Estimating age-stratified influenza-associated invasive pneumococcal disease in England: A time-series model based on population surveillance data
Source: PubMed Central journal article supplement (PMC6597037; doi:10.1371/journal.pmed.1002829), 2019-06-27
Supplement: pmed.1002829.s015.pdf [file pmed.1002829.s015.pdf]

| Age     | $\alpha$ | $\gamma$ | $\delta$ | $\log(\psi)$ | $\log(\tau)$ | $\log(\lambda)$ | $\log(\phi)$ |
|---------|----------|----------|----------|--------------|--------------|-----------------|--------------|
| <5      | -2.282   | -0.317   | -0.037   | 2.513        | -13.847      | 2.182           | 1.291        |
| 5 – 14  | -4.422   | -0.369   | -0.037   | 1.590        | -3.262       | 2.283           | 1.364        |
| 15 – 44 | -4.035   | -0.477   | -0.037   | 3.024        | -1.629       | 3.729           | 4.093        |
| 45 – 64 | -2.776   | -0.342   | -0.037   | 3.173        | -2.150       | 3.479           | 3.610        |
| 65+     | -1.938   | -0.464   | -0.037   | 3.188        | -6.714       | 3.423           | 4.246        |

**S2 Table .** Model I: Coefficient estimates for the age-specific model of IPD including Flu. Since Flu coefficients  $\tau_{<5}$  and  $\tau_{65+}$  were very small, we refitted the model fixing them to 0, to make sure the other parameter estimates were not sensitive to such an assumption.
