# Supplementary material for: Estimating age-stratified influenza-associated invasive pneumococcal disease in England: A time-series model based on population surveillance data
Source: PubMed Central journal article supplement (PMC6597037; doi:10.1371/journal.pmed.1002829), 2019-06-27
Supplement: pmed.1002829.s016.pdf [file pmed.1002829.s016.pdf]

| Age     | $\alpha$ | $\gamma$ | $\delta$ | $\log(\psi)$ | $\log(\tau)$ | $\log(\lambda)$ | $\log(\phi)$ |
|---------|----------|----------|----------|--------------|--------------|-----------------|--------------|
| <5      | 0.126    | 0.040    | 0.024    | 0.197        | 177.157      | 0.179           | 0.398        |
| 5 – 14  | 0.254    | 0.086    | 0.024    | 0.269        | 0.354        | 0.301           | 0.482        |
| 15 – 44 | 0.182    | 0.063    | 0.024    | 0.148        | 0.307        | 0.264           | 0.127        |
| 45 – 64 | 0.119    | 0.039    | 0.024    | 0.126        | 1.048        | 0.221           | 0.141        |
| 65+     | 0.111    | 0.034    | 0.024    | 0.101        | -            | 0.158           | 0.147        |

**S3 Table .** Model I: Standard error estimates for the age-specific model of IPD including Flu. Uncertainty around coefficients  $\tau_{<5}$  and  $\tau_{65+}$  was not well estimated.
