# Supplementary material for: Estimating age-stratified influenza-associated invasive pneumococcal disease in England: A time-series model based on population surveillance data
Source: PubMed Central journal article supplement (PMC6597037; doi:10.1371/journal.pmed.1002829), 2019-06-27
Supplement: pmed.1002829.s017.pdf [file pmed.1002829.s017.pdf]

| Age   | $\alpha$ | $\gamma$ | $\delta$ | $\log(\psi)$ | $\log(\tau)$ | $\log(\theta)$ | $\log(\zeta)$ | $\log(\lambda)$ | $\log(\phi)$ |
|-------|----------|----------|----------|--------------|--------------|----------------|---------------|-----------------|--------------|
| <5    | -2.369   | -0.319   | -0.062   | 2.524        | -            | -2.307         | -4.000        | 2.178           | 1.225        |
| 5-14  | -4.395   | -0.367   | -0.062   | 1.598        | -3.245       | -              | -             | 2.282           | 1.308        |
| 15-44 | -4.034   | -0.477   | -0.062   | 3.027        | -1.627       | -              | -             | 3.725           | 4.094        |
| 45-64 | -2.912   | -0.315   | -0.062   | 3.304        | -2.156       | 2.215          | 2.754         | 3.158           | 3.646        |
| 65+   | -2.046   | -0.458   | -0.062   | 3.341        | -            | 2.504          | 2.571         | 3.097           | 4.337        |

**S4 Table .** Model K: Coefficient estimates for the age-specific model of IPD including Flu, rhinovirus and RSV
