# Supplementary material for: Estimating age-stratified influenza-associated invasive pneumococcal disease in England: A time-series model based on population surveillance data
Source: PubMed Central journal article supplement (PMC6597037; doi:10.1371/journal.pmed.1002829), 2019-06-27
Supplement: pmed.1002829.s018.pdf [file pmed.1002829.s018.pdf]

| Age     | $\alpha$ | $\gamma$ | $\delta$ | $\log(\psi)$ | $\log(\tau)$ | $\log(\theta)$ | $\log(\zeta)$ | $\log(\lambda)$ | $\log(\phi)$ |
|---------|----------|----------|----------|--------------|--------------|----------------|---------------|-----------------|--------------|
| < 5     | 0.016    | 0.017    | 0.003    | 0.039        | -            | 0.311          | 1.140         | 0.011           | 0.016        |
| 5 – 14  | 0.014    | 0.009    | 0.003    | 0.072        | 0.100        | -              | -             | 0.052           | 0.025        |
| 15 – 44 | 0.006    | 0.006    | 0.003    | 0.022        | 0.066        | -              | -             | 0.007           | 0.001        |
| 45 – 64 | 0.014    | 0.012    | 0.003    | 0.018        | 0.671        | 0.040          | 0.051         | 0.006           | 0.001        |
| 65+     | 0.004    | 0.003    | 0.003    | 0.011        | -            | 0.028          | 0.047         | 0.003           | 0.001        |

**S5 Table .** Model K: Coefficient standard errors for the age-specific model of IPD including Flu, rhinovirus and RSV
